# Supplementary material for: Synthesis and characterization of Co3O4 nanocube-doped polyaniline nanocomposites with enhanced methyl orange adsorption from aqueous solution
Source: Royal Society of Chemistry journal article supplement (doi:10.1039/c6ra04757b), 2016-01-01
Supplement: c6ra04757b1.pdf [file c6ra04757b1.pdf]

## Supporting Information

**Journal:**

**Title:** “Synthesis and Characterization of  $\text{Co}_3\text{O}_4$  Nanocube Doped Polyaniline Nanocomposites with Enhanced Methyl Orange Adsorption from Aqueous Solution”

**Authors:** Syed Shahabuddin<sup>a</sup>, Norazilawati Muhamad Sarih<sup>a\*</sup>, Sharifah Mohamad and Siti Nor Atika Baharin

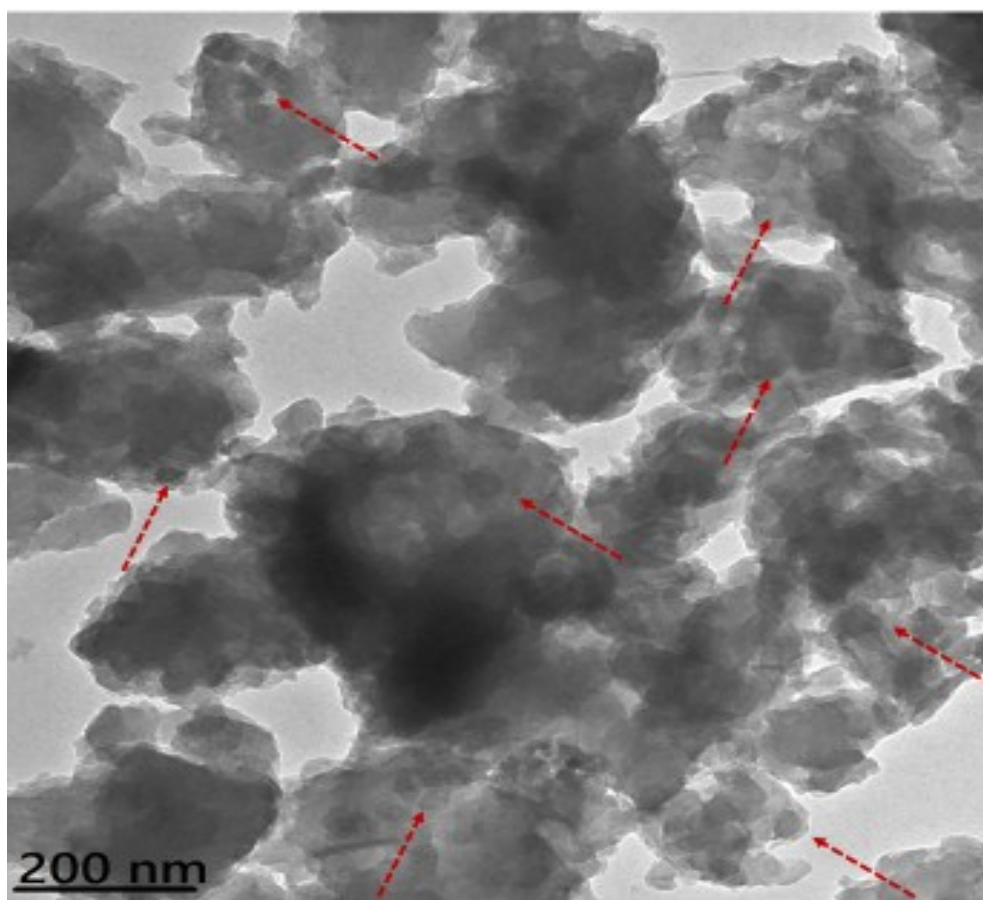

**Figure S1.** TEM image of PANI-Co<sub>4</sub> nanocomposite.

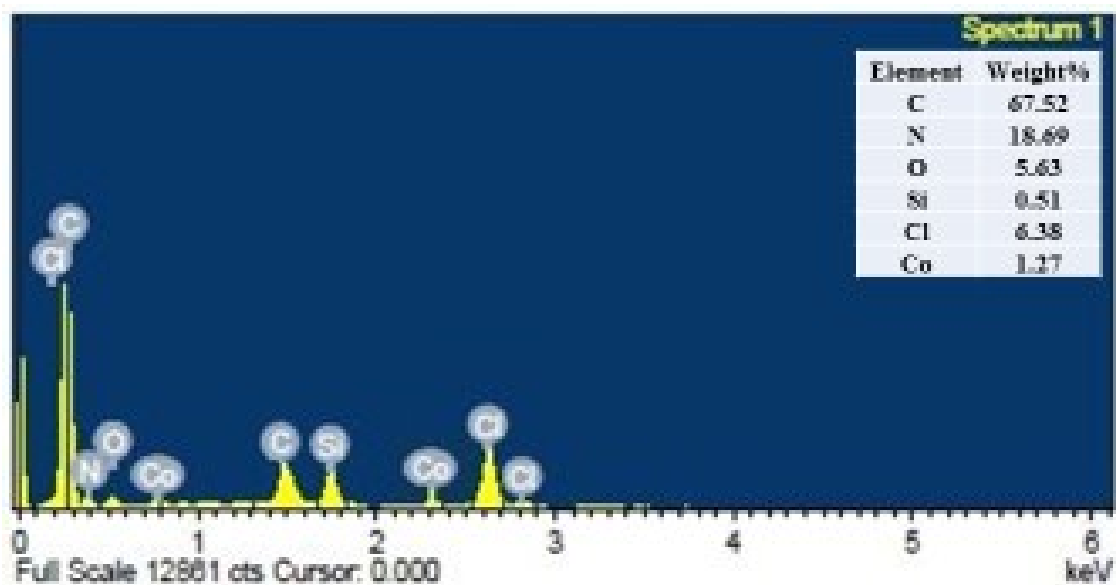

**Figure S2.** EDX spectrum of PANI-Co4 nanocomposite.

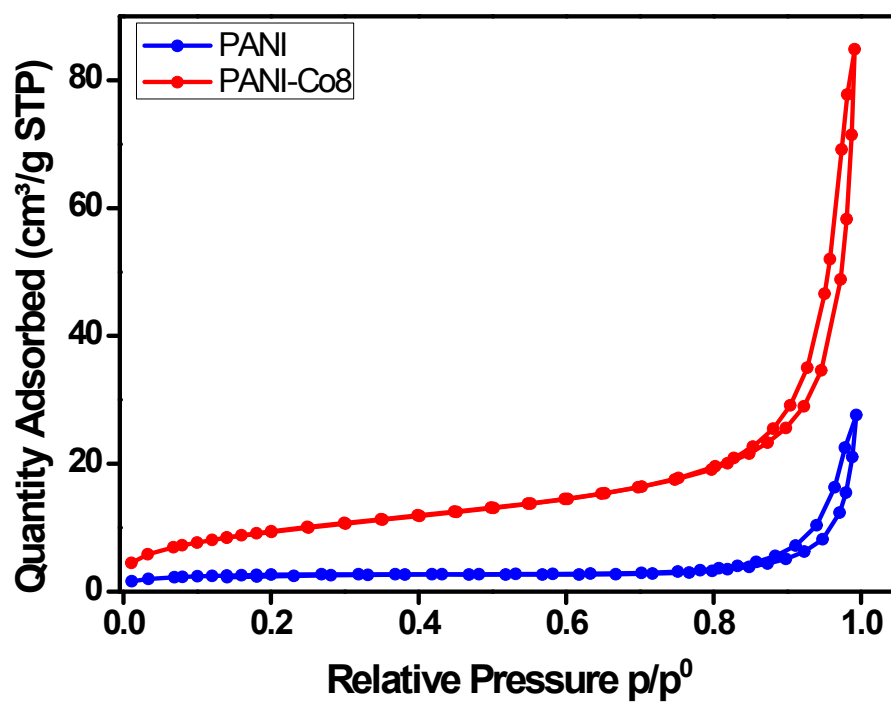

**Figure S3.** Nitrogen adsorption–desorption isotherms (BET) PANI and PANI-Co8 nanocomposite.
